# Supplementary figures and images for: Epithelial HNF4A shapes the intraepithelial lymphocyte compartment via direct regulation of immune signaling molecules
Source: PubMed Central journal article supplement — J Exp Med. 2022 Jul 6;219(8):e20212563. doi: 10.1084/jem.20212563 (PMC9263552; doi:10.1084/jem.20212563), 2022-07-06

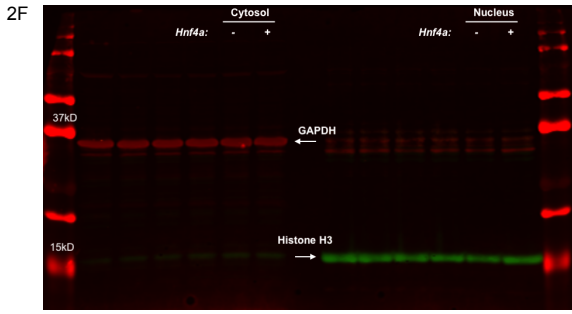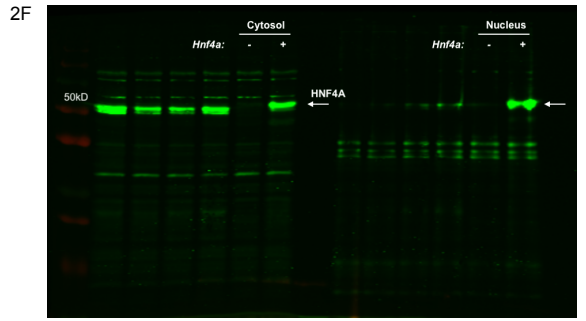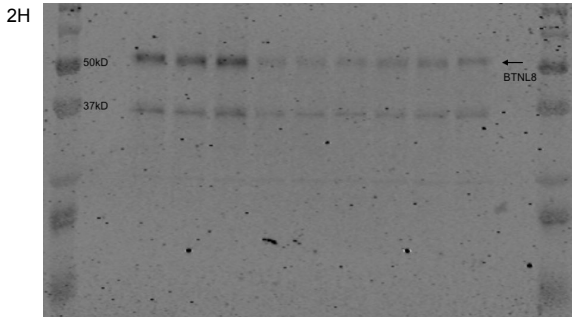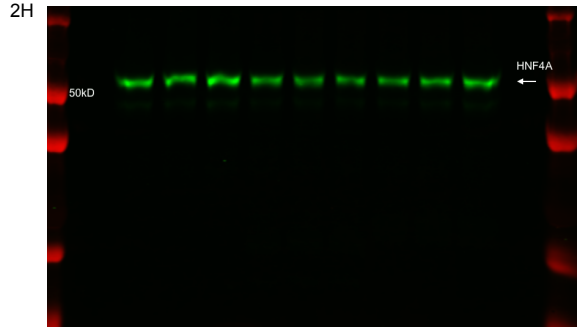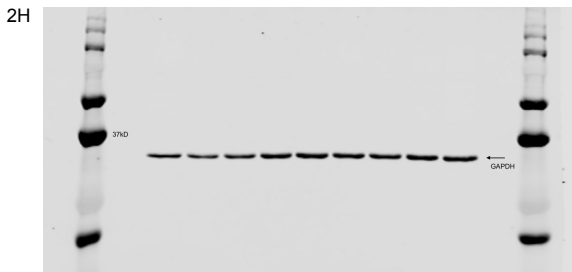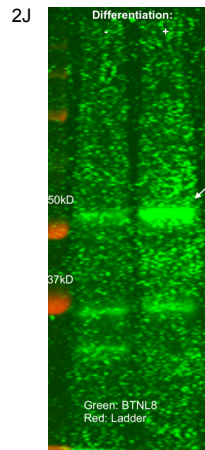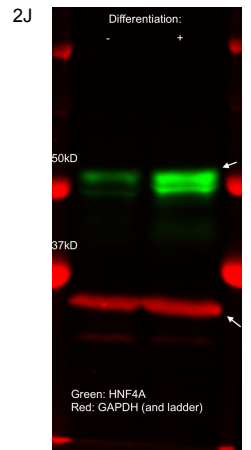

Supplement: JEM_20212563_SourceDataF2.pdf [file JEM_20212563_SourceDataF2.pdf]

5G

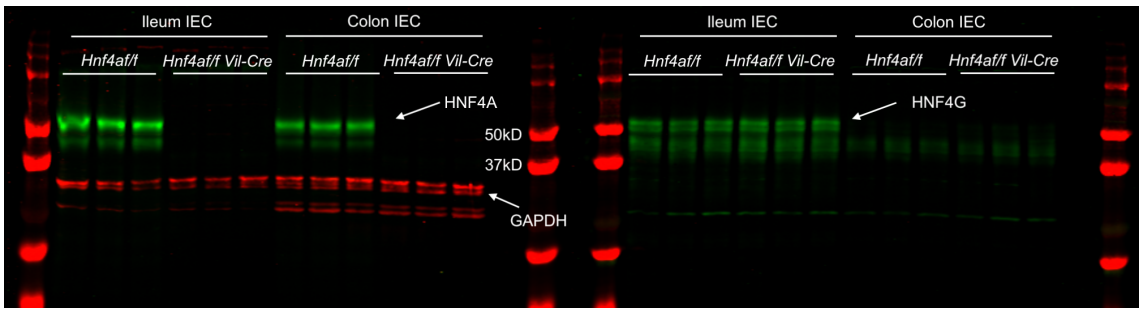

Supplement: JEM_20212563_SourceDataF5.pdf [file JEM_20212563_SourceDataF5.pdf]

S3F

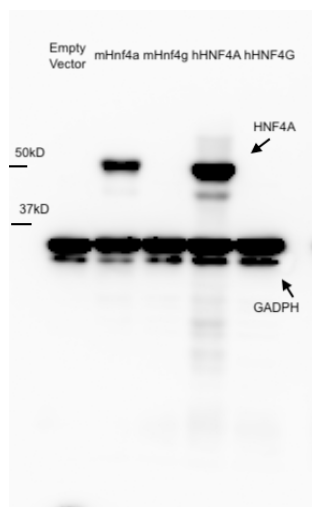

S3F

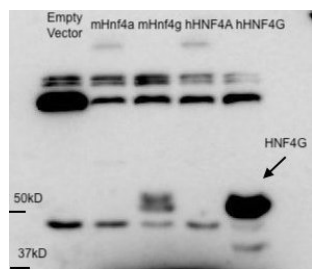

Supplement: JEM_20212563_SourceDataFS3.pdf [file JEM_20212563_SourceDataFS3.pdf]
